# Supplementary material for: SARS-CoV-2 Consensus-Sequence and Matching Overlapping Peptides Design for COVID19 Immune Studies and Vaccine Development
Source: MDPI journal article supplement (doi:10.3390/vaccines8030444), 2020-08-06
Supplement: s1 [file s1]

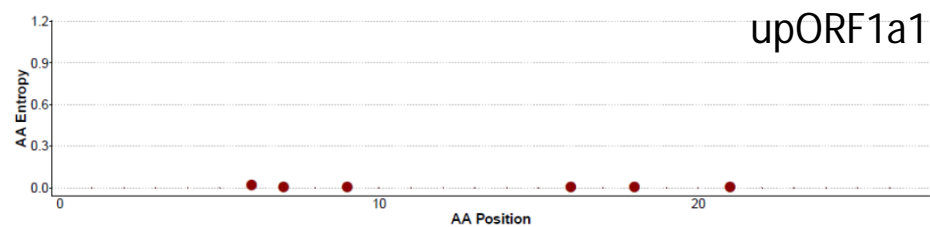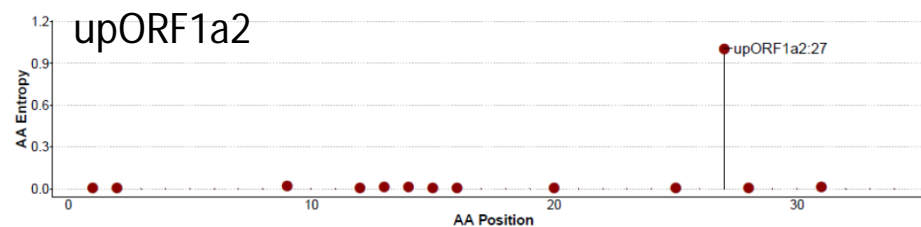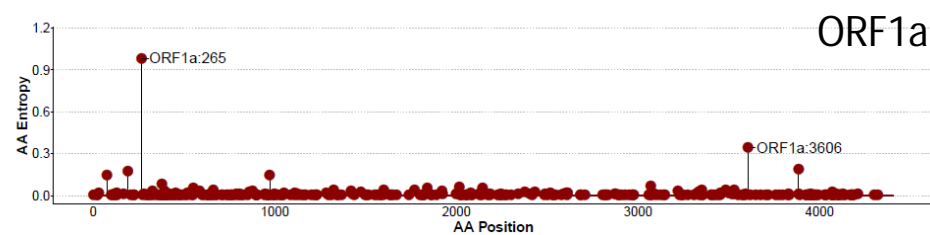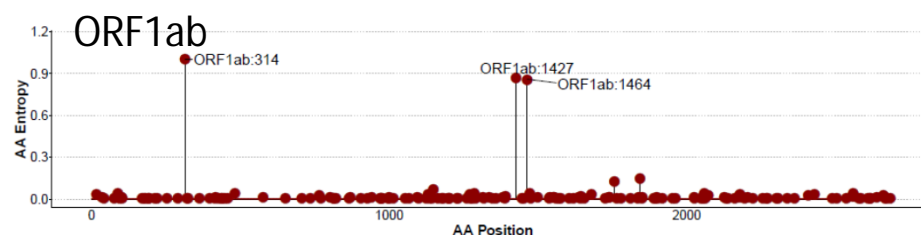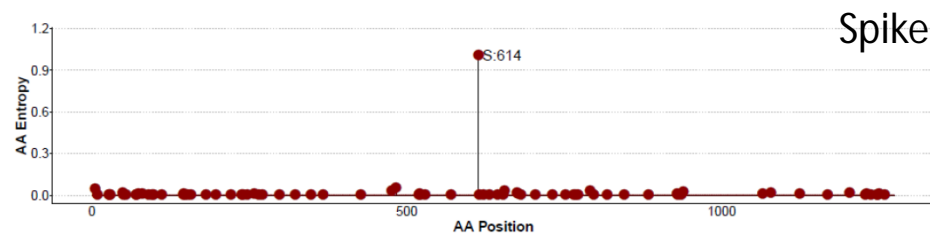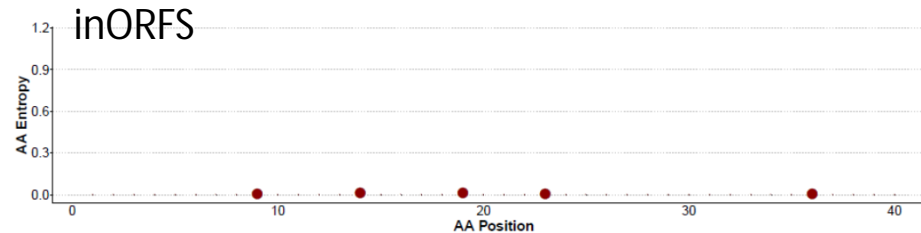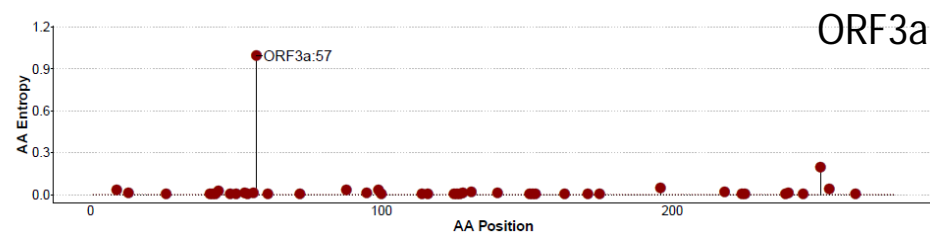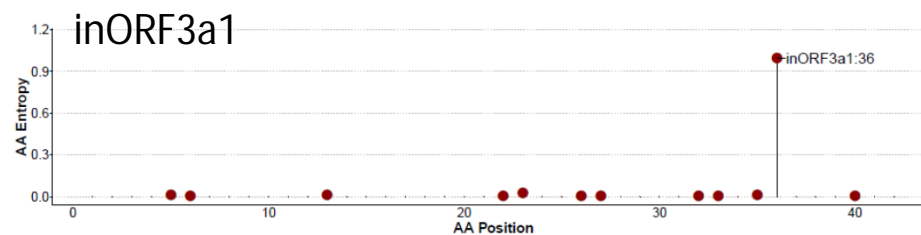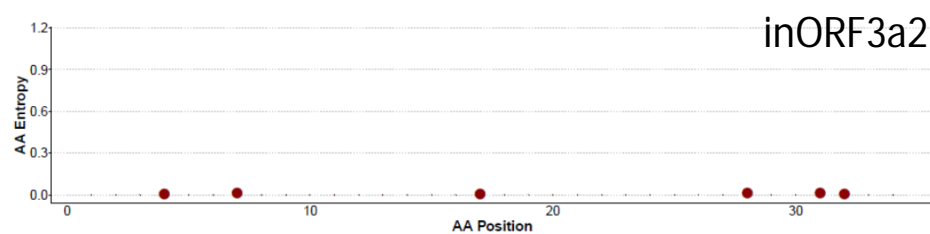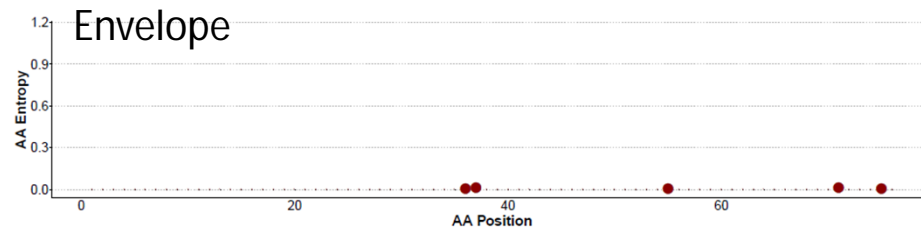

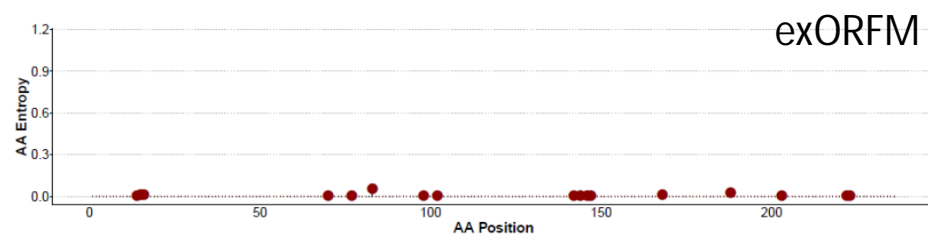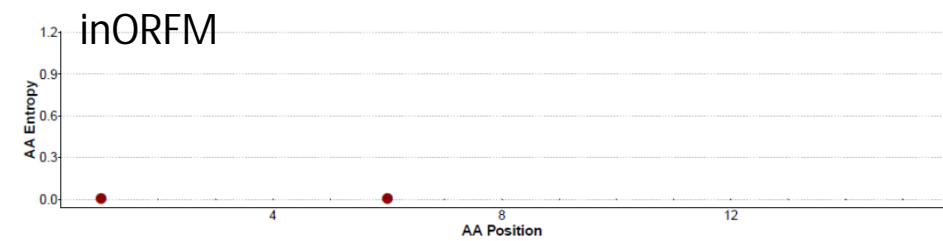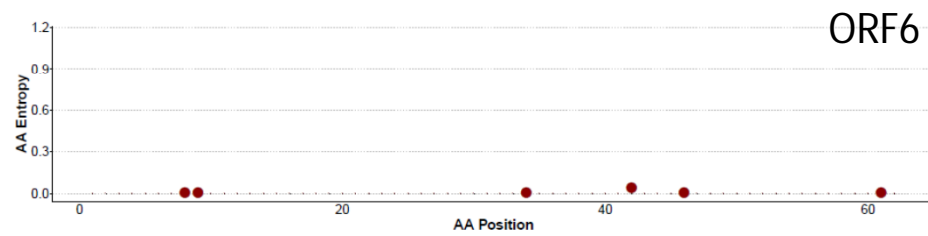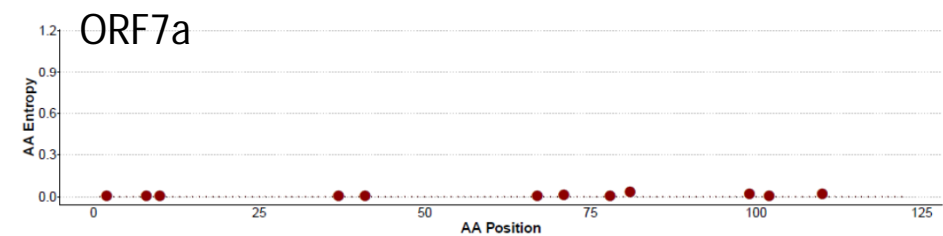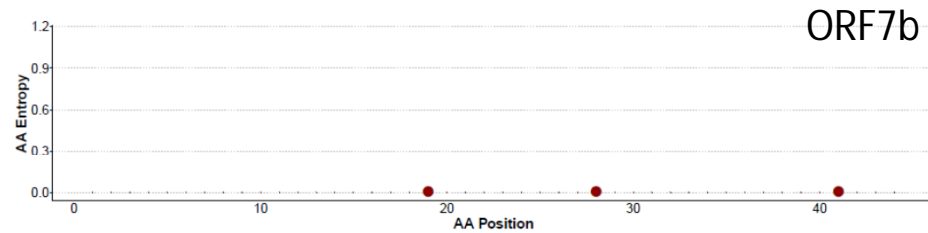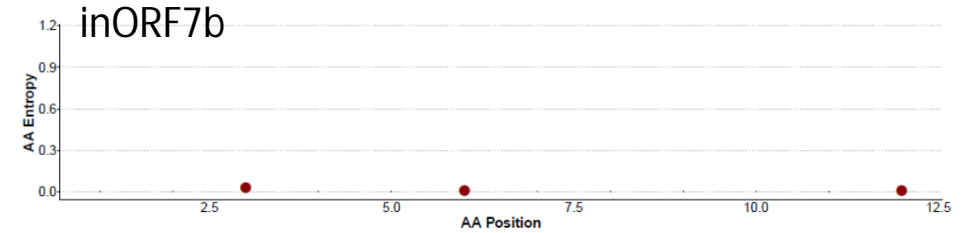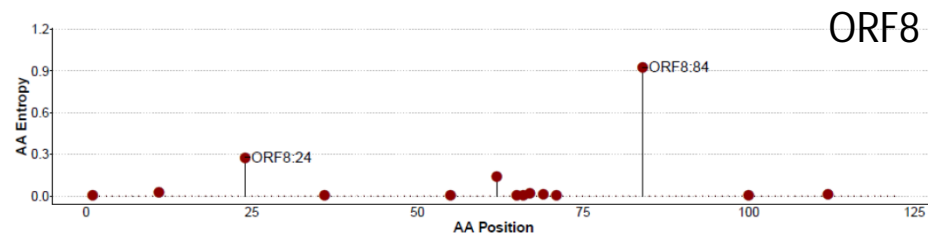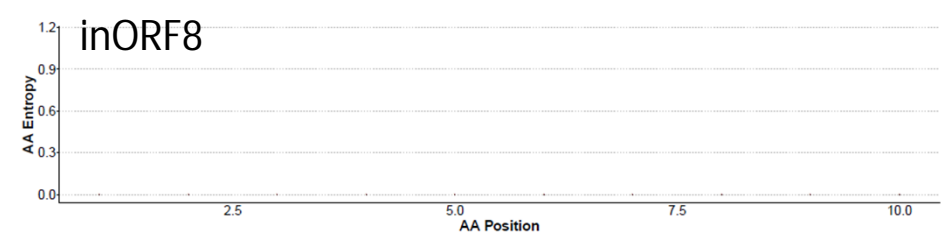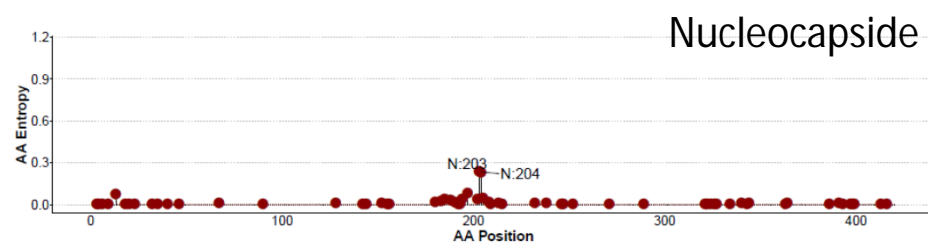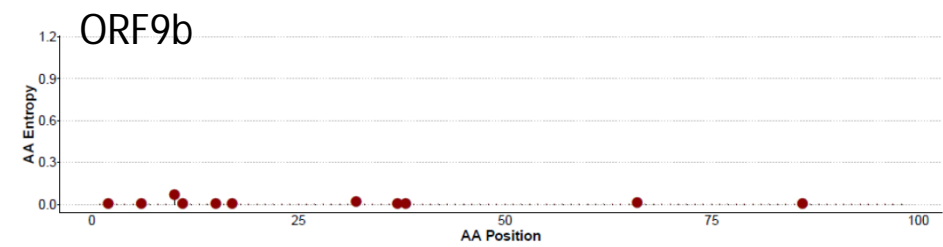

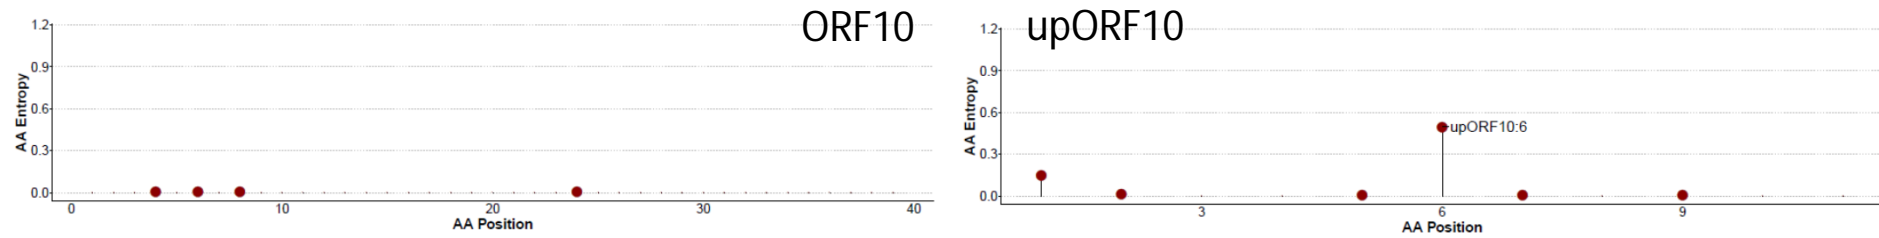

**Supplementary figure S1.** Shannon entropy plot by amino acid position for all canonical and alternative frame ORF of SARS-CoV-2. Only plot for the membrane protein is not included since it is completely embedded in exORFM.
