# Supplementary material for: SARS-CoV-2 Consensus-Sequence and Matching Overlapping Peptides Design for COVID19 Immune Studies and Vaccine Development
Source: MDPI journal article supplement (doi:10.3390/vaccines8030444), 2020-08-06
Supplement: s1 [file s1]

ORF1ab

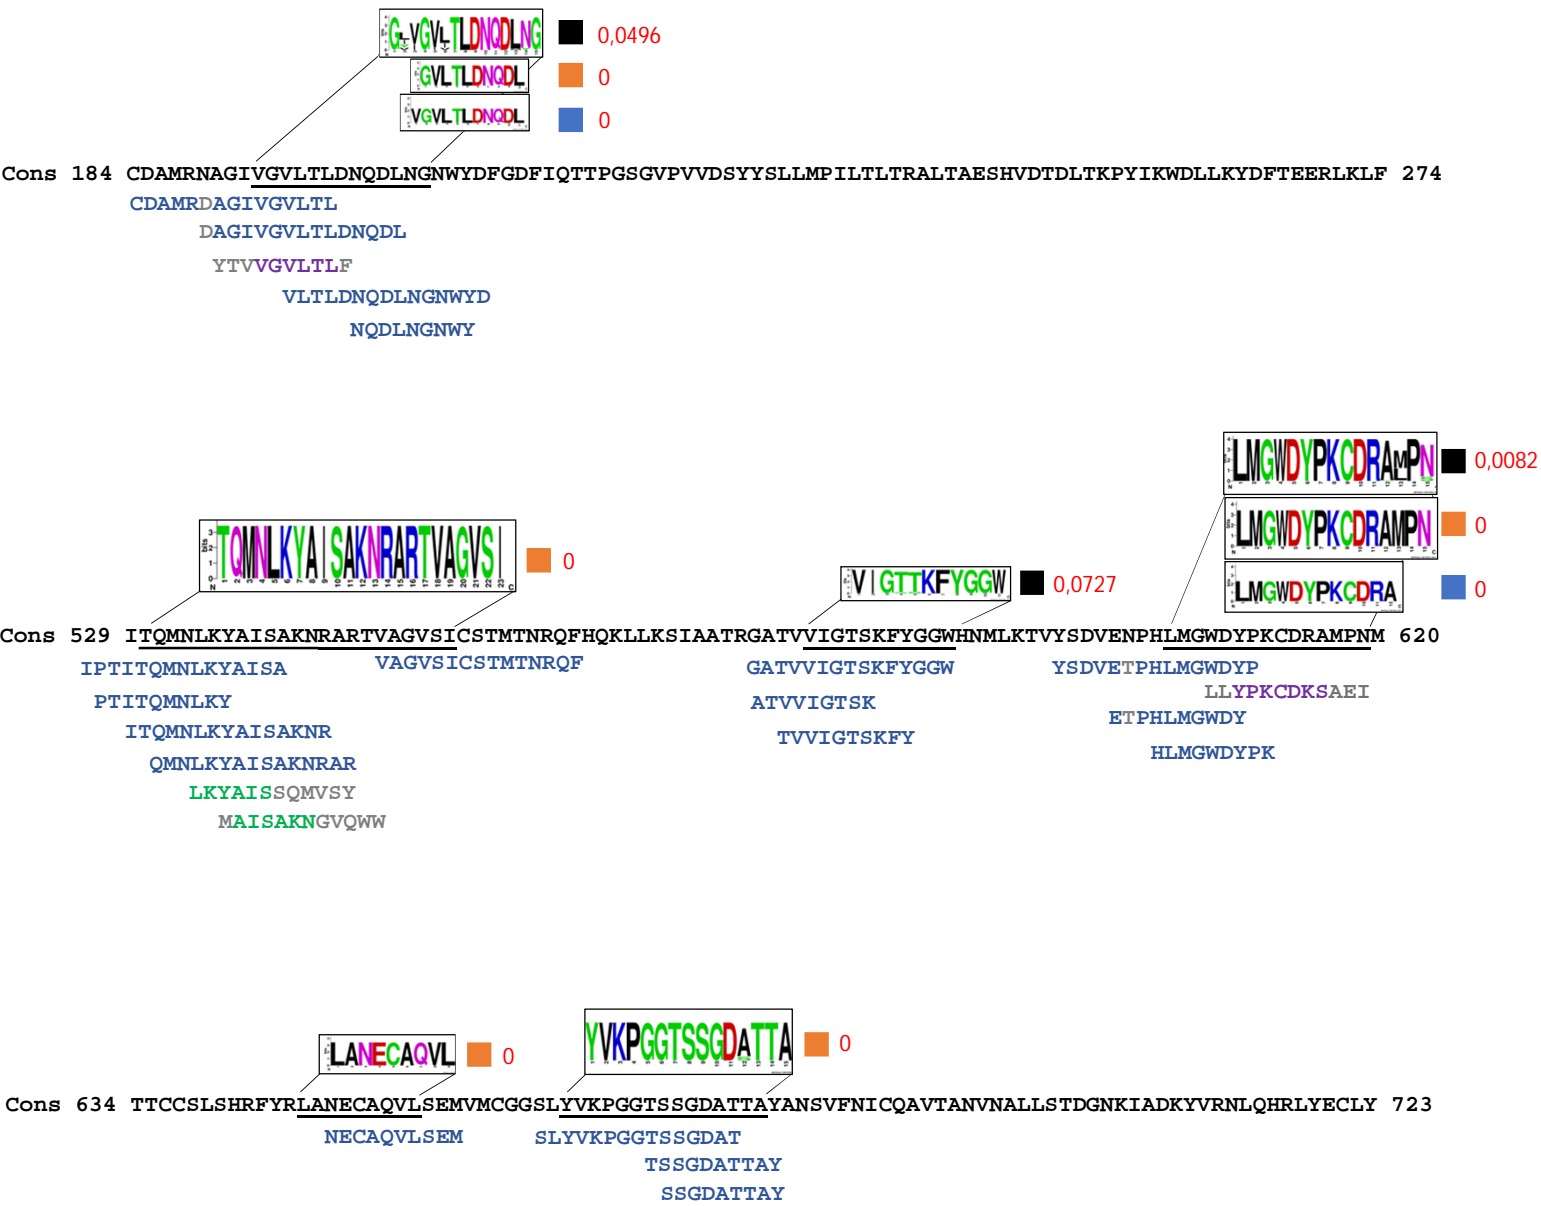

**Color map**

- Unknown
- SARS-CoV
- Human
- Other Coronavirus
- Amino acid mismatch
- Consensus conserved region

**Symbols**

- Pan-coronavirus conservation
- Betacoronavirus conservation
- Human coronavirus conservation

Average entropy

ORF1ab

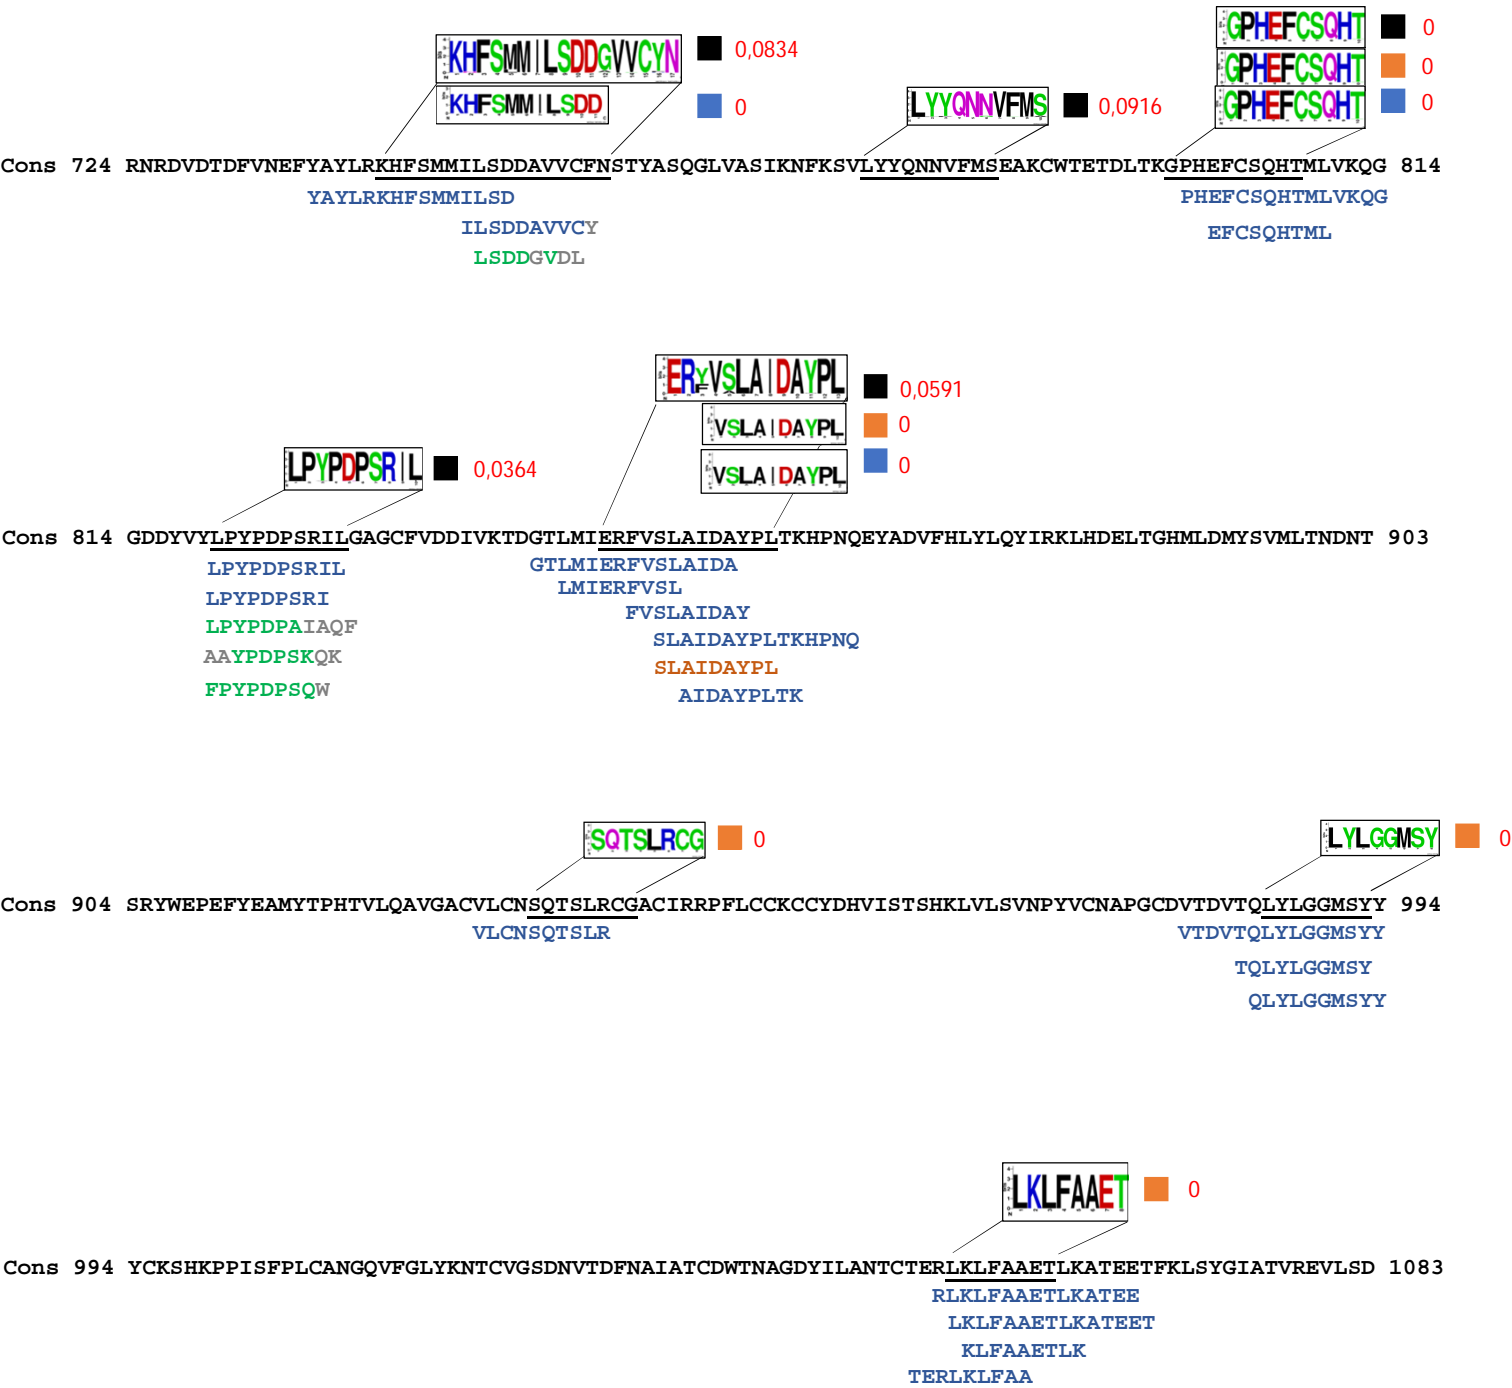

Color map

- Unknown
- SARS-CoV
- Human
- Other Coronavirus
- Amino acid mismatch
- Consensus conserved region

Symbols

- Pan-coronavirus conservation
- Betacoronavirus conservation
- Human coronavirus conservation

Average entropy

ORF1ab

QPPPGTKSH

0

SHAAVDALCEKA  
TACSHAAVD

0

0,1287

Cons 1174 GLYPTLNISDEFSSNVANYQKVGMMQKYSTLQPPPGTKSHFAIGLALYYPSARIVYTACSHAAVDALCEKALKYLPIDKCSRIIPARARV 1263

RAVLLAGPPPGTGKTALAA  
ALCEKALKY  
GLLLYGPPPGTGK  
GVILYGPPPGTGK  
GILLYGPPPGTGK  
GVLLYGPPPGTGK  
LLYGPPPGTGKTLLARAV  
LLYGPPPGTGKTLLAK  
ILYGPPPGTGKTLLAK  
LLYGPPPGTGKTLLIARAV  
ILYGPPPGTGKTL  
ILYGPPPGTGKTLL  
ILYGPPPGTGK  
LLYGPPPGTGK  
TLQGPPPGTGK  
LLFGPPPGTGKSY  
IIAGPPPGTGK  
ILFGPPPGTGK  
LLFGPPPGTGK  
LMYGPPPGTGK  
LMYGPPPGTGK  
LLAGPPPGTGK  
IIFGPPPGTGK  
MVGPPPGTGK  
LVGPPPGTGK  
IQGPPPGTGKTY  
LQGPPPGTGK  
IQGPPPGTGK  
LTGPPPGTGK  
VVGPPPGTGK  
MVGPPPGTGK  
YGPPPGTGKTL  
VGPPPGTGKTL  
FGPPPGTGKTL  
GPPPGTGKSYLAKAVATEAN  
GPPPGTGKTLLIARAVANETG  
GPPPGTGKTLLIARAVANETGA  
GPPPGTGKTLLIARAVANETGAF  
GPPPGTGKTAL  
GPPPGTGKTLL  
GPPPGTGKTLLI  
GPPPGTGKTL  
GPPPGTGKTI  
VPGTGKSTL

ORF1ab

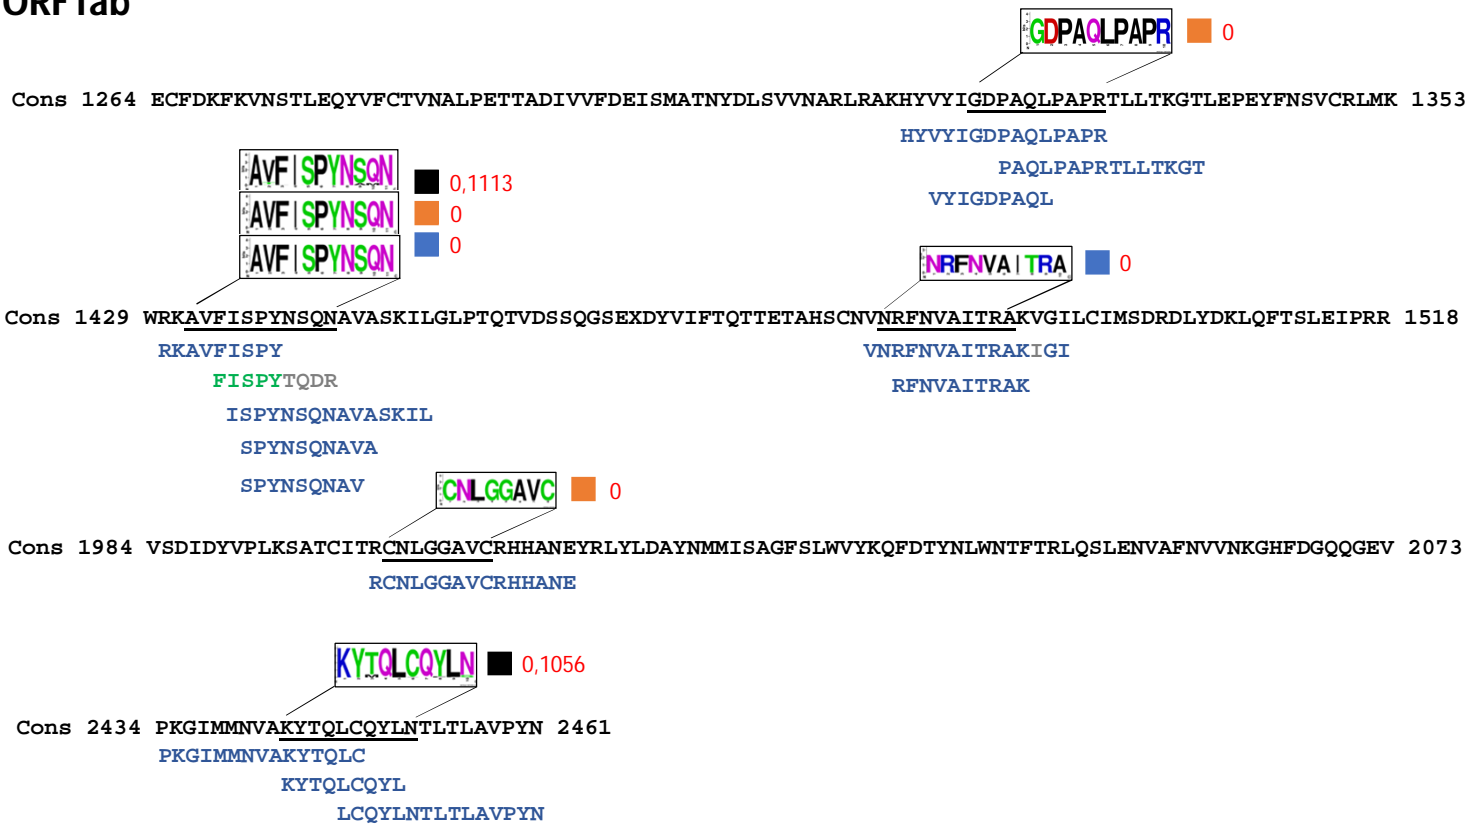

**Color map**

- Unknown
- SARS-CoV
- Human
- Other Coronavirus
- Amino acid mismatch
- Consensus conserved region

**Symbols**

- Pan-coronavirus conservation
- Betacoronavirus conservation
- Human coronavirus conservation

Average entropy

Spike

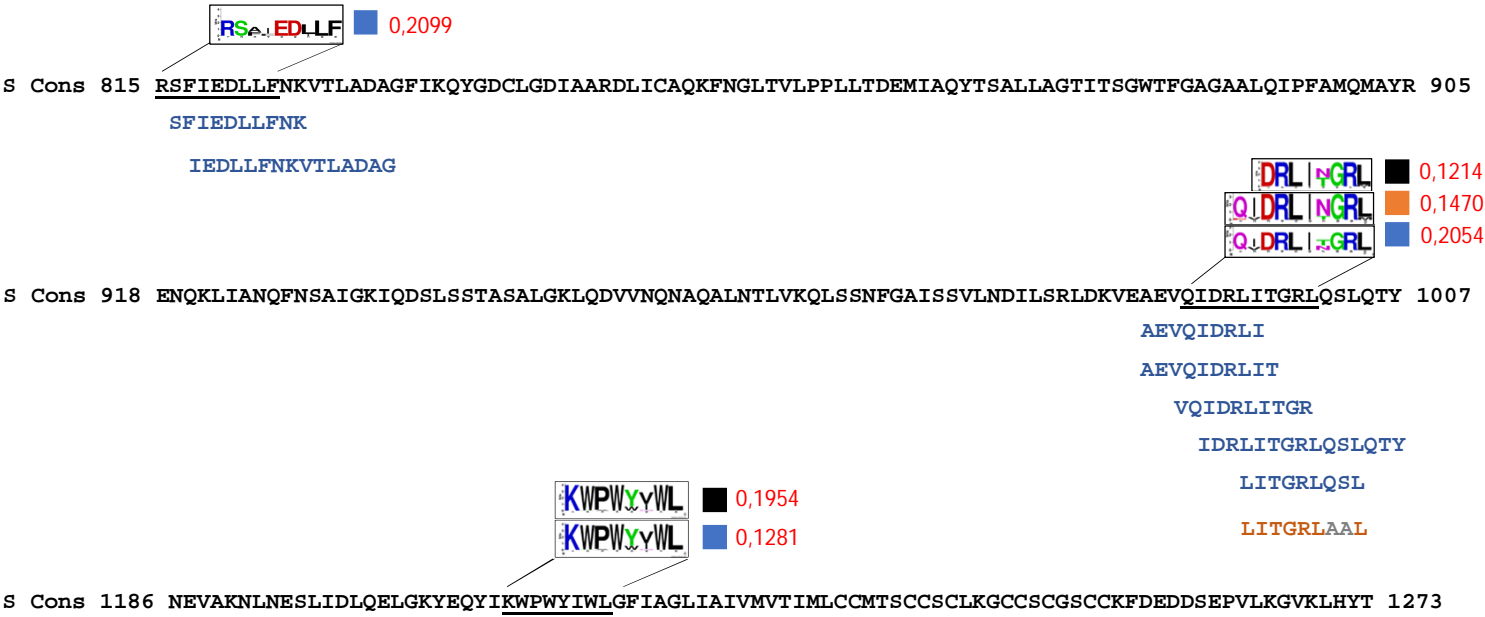

**Color map**

- Unknown
- SARS-CoV
- Human
- Other Coronavirus
- Amino acid mismatch
- Consensus conserved region

**Symbols**

- Pan-coronavirus conservation
- Betacoronavirus conservation
- Human coronavirus conservation

Average entropy

Membrane

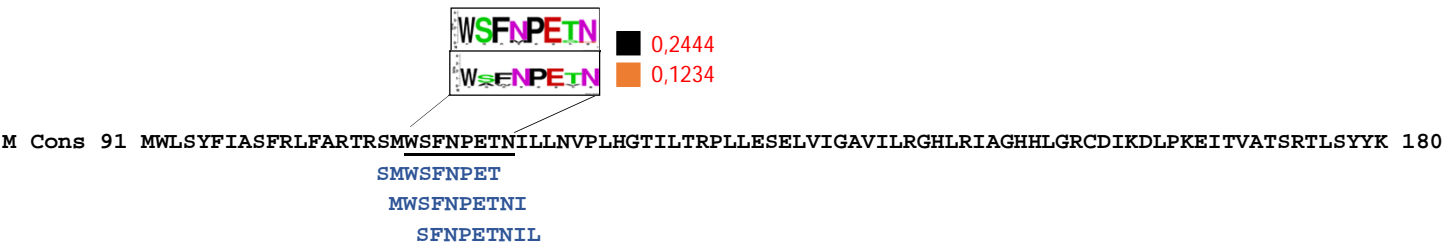

Nucleocapsid

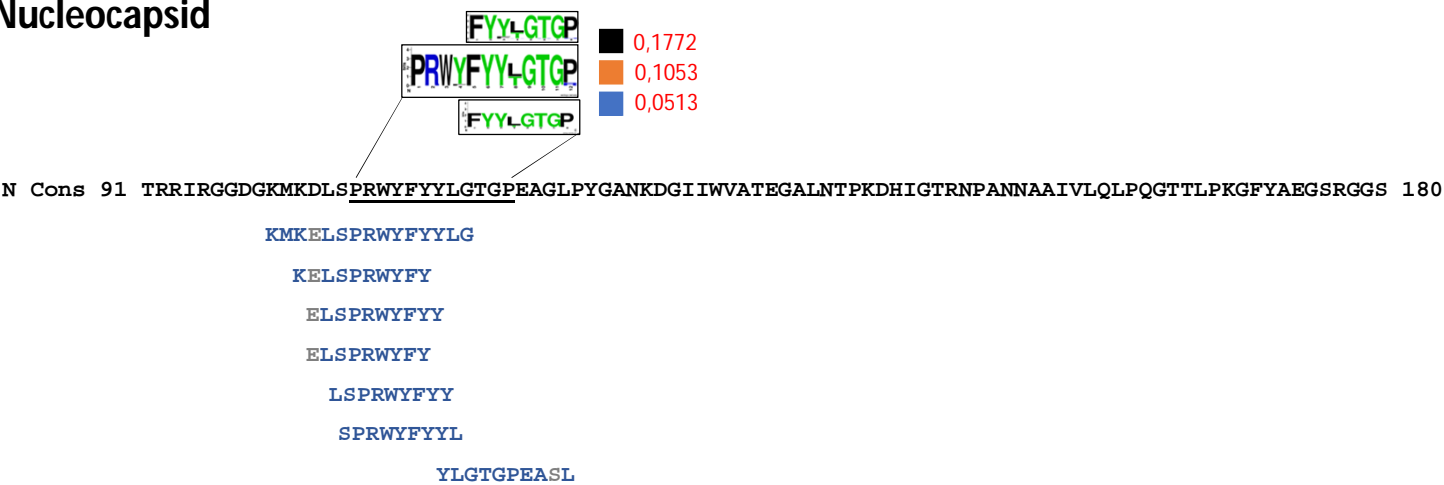

**Color map**

- Unknown
- SARS-CoV
- Human
- Other Coronavirus
- Amino acid mismatch
- Consensus conserved region

**Symbols**

- Pan-coronavirus conservation
- Betacoronavirus conservation
- Human coronavirus conservation

Average entropy

**Supplementary Figure S2.** SARS-CoV-2 ORF fragments containing conserved regions in Human, Betacoronavirus or Pan-coronavirus alignments are shown. Epitope description was carried out based on experimentally described epitopes from the Immune Epitope Database (IEDB, [www.iedb.org](http://www.iedb.org)). Species where the epitope was described are indicated by sequence color. Logos of conserved sequences along the three alignments (Pan-coronavirus, Betacoronavirus or Human coronavirus) were included. The alignment where the conserved regions were identified is indicated by color squares
